# Supplementary material for: Prognostic Signature for Lung Adenocarcinoma Patients Based on Cell-Cycle-Related Genes
Source: Front Cell Dev Biol. 2021 Mar 18;9:655950. doi: 10.3389/fcell.2021.655950 (PMC8044954; doi:10.3389/fcell.2021.655950)
Supplement: Supplementary Table 1 — Details of 801 CCRGs in LUAC. [file Table_1.XLSX]

## Sheet: Sheet1
	GO_CELL_CYCLE		KEGG_CELL_CYCLE
symbol	cor	pvalue	cor	pvalue
ABCE1	0.567549	9.57e-41	0.501926	7.48e-31
ABCF2	0.429531	3.64e-22	0.443292	1.16e-23
ACAT2	0.523439	7.35e-34	0.524831	4.61e-34
ACLY	0.430078	3.18e-22	0.421656	2.44e-21
ACOT7	0.42792	5.39e-22	0.456491	3.68e-25
ACP1	0.522686	9.44e-34	0.489357	3.42e-29
ACTL6A	0.558165	3.41e-39	0.519687	2.55e-33
ACTR6	0.419266	4.3e-21	0.340792	5e-14
ACYP1	0.449832	2.14e-24	0.407289	6.88e-20
ADA	0.410741	3.13e-20	0.432344	1.82e-22
ADNP	0.469241	1.13e-26	0.392006	2.02e-18
ADRM1	0.409262	4.39e-20	0.410634	3.21e-20
ADSL	0.45109	1.54e-24	0.451278	1.47e-24
AGPAT5	0.381816	1.75e-17	0.339539	6.27e-14
AGPS	0.460596	1.22e-25	0.433648	1.32e-22
AHCY	0.481127	3.85e-28	0.481928	3.05e-28
AHSA1	0.43848	3.95e-23	0.432347	1.82e-22
ALG8	0.359837	1.44e-15	0.333951	1.69e-13
AMD1	0.387703	5.08e-18	0.337347	9.27e-14
ANAPC5	0.385114	8.79e-18	0.33816	8.02e-14
ANP32B	0.492447	1.36e-29	0.512213	2.9e-32
ANP32E	0.47324	3.68e-27	0.46251	7.24e-26
AP2M1	0.381641	1.82e-17	0.420751	3.02e-21
APEX1	0.376024	5.78e-17	0.381006	2.07e-17
APOB	0.341606	4.32e-14	0.322055	1.31e-12
APOBEC3B	0.406136	8.94e-20	0.426389	7.82e-22
ARHGAP11A	0.433534	1.36e-22	0.423068	1.74e-21
ARL6IP1	0.424851	1.13e-21	0.379233	2.99e-17
ARMC1	0.404725	1.23e-19	0.357699	2.16e-15
ARPC1A	0.349477	1.02e-14	0.417968	5.83e-21
ASF1B	0.64819	2.09e-56	0.69308	2.19e-67
ASGR2	0.309	1.12e-11	0.302075	3.34e-11
ASNS	0.492377	1.39e-29	0.435833	7.67e-23
ASPM	0.77878	3.28e-95	0.743294	2.42e-82
ATAD2	0.729412	7.14e-78	0.676052	5.43e-63
ATG5	0.405897	9.44e-20	0.37598	5.83e-17
ATIC	0.472424	4.63e-27	0.495807	4.91e-30
ATP1B3	0.399339	4.09e-19	0.435206	8.97e-23
AURKA	0.742831	3.45e-82	0.766395	1.85e-90
AURKB	0.707022	3.21e-71	0.734077	2.42e-79
BANF1	0.436609	6.32e-23	0.432706	1.67e-22
BARD1	0.483519	1.92e-28	0.460229	1.35e-25
BCAS2	0.419476	4.09e-21	0.327815	4.91e-13
BCCIP	0.496448	4.04e-30	0.444061	9.55e-24
BCL2L11	0.323117	1.09e-12	0.362225	9.04e-16
BEX1	0.371124	1.56e-16	0.348189	1.3e-14
BIRC5	0.616269	1.16e-49	0.668491	3.91e-61
BLM	0.486789	7.33e-29	0.483779	1.78e-28
BNIP3	0.398611	4.8e-19	0.393596	1.44e-18
BRAP	0.370624	1.72e-16	0.316778	3.15e-12
BRCA1	0.729114	8.85e-78	0.707848	1.87e-71
BRCA2	0.408606	5.1e-20	0.400491	3.17e-19
BRIP1	0.489125	3.67e-29	0.467128	2.03e-26
BSG	0.300115	4.53e-11	0.30792	1.33e-11
BUB1	0.817542	2.55e-112	0.810924	4.02e-109
BUB1B	0.825732	1.83e-116	0.837804	5.56e-123
BUB3	0.556932	5.4e-39	0.514258	1.5e-32
BYSL	0.443564	1.08e-23	0.477325	1.15e-27
BZW1	0.35158	6.89e-15	0.328869	4.1e-13
BZW2	0.334011	1.67e-13	0.330845	2.91e-13
C17orf75	0.388313	4.47e-18	0.32113	1.53e-12
C1orf112	0.601802	7.45e-47	0.569487	4.51e-41
C1QBP	0.470959	7e-27	0.49672	3.72e-30
C20orf27	0.406938	7.45e-20	0.423088	1.73e-21
C6orf120	0.393014	1.63e-18	0.355356	3.38e-15
C9orf40	0.357876	2.09e-15	0.371472	1.45e-16
C9orf78	0.423073	1.74e-21	0.37829	3.64e-17
CACYBP	0.631955	7.05e-53	0.576466	2.88e-42
CAD	0.46121	1.03e-25	0.424791	1.15e-21
CALU	0.408721	4.97e-20	0.464637	4.04e-26
CASP8AP2	0.424891	1.12e-21	0.307377	1.45e-11
CBLL1	0.323052	1.11e-12	0.319371	2.05e-12
CBS	0.458884	1.94e-25	0.439229	3.27e-23
CBX1	0.592634	3.79e-45	0.500785	1.06e-30
CBX5	0.405416	1.05e-19	0.399065	4.34e-19
CCDC59	0.59134	6.54e-45	0.493491	9.9e-30
CCDC90B	0.396419	7.76e-19	0.331645	2.53e-13
CCNA2	0.7153	1.32e-73	0.767083	1.02e-90
CCNB1	0.819202	3.83e-113	0.872523	3.44e-145
CCNB1IP1	0.413487	1.66e-20	0.33651	1.08e-13
CCNB2	0.799819	4.97e-104	0.855664	1.12e-133
CCNE1	0.500664	1.11e-30	0.548984	1.01e-37
CCNE2	0.705047	1.16e-70	0.678849	1.08e-63
CCNF	0.526258	2.86e-34	0.525107	4.2e-34
CCT2	0.528164	1.5e-34	0.534769	1.56e-35
CCT3	0.456256	3.92e-25	0.432395	1.8e-22
CCT4	0.57701	2.32e-42	0.561217	1.08e-39
CCT5	0.602752	4.92e-47	0.624056	3.09e-51
CCT6A	0.420787	3e-21	0.334597	1.51e-13
CCT7	0.56646	1.46e-40	0.600541	1.29e-46
CCT8	0.499136	1.77e-30	0.37767	4.13e-17
CD3EAP	0.350881	7.86e-15	0.35132	7.24e-15
CDC20	0.722713	8.19e-76	0.790791	4.03e-100
CDC25A	0.643529	2.26e-55	0.653334	1.43e-57
CDC25C	0.636121	9.18e-54	0.670596	1.2e-61
CDC5L	0.487746	5.53e-29	0.435396	8.55e-23
CDC6	0.725037	1.61e-76	0.760064	3.82e-88
CDC7	0.61674	9.32e-50	0.570507	3.03e-41
CDCA3	0.680807	3.45e-64	0.732766	6.31e-79
CDCA4	0.610598	1.52e-48	0.62175	9.14e-51
CDCA8	0.735251	1.02e-79	0.798808	1.39e-103
CDH2	0.376999	4.74e-17	0.37547	6.48e-17
CDK2	0.612451	6.59e-49	0.590238	1.04e-44
CDK4	0.326094	6.6e-13	0.374343	8.14e-17
CDKN2C	0.327683	5.03e-13	0.382589	1.49e-17
CDKN3	0.756968	4.88e-87	0.780248	8.57e-96
CDT1	0.598421	3.22e-46	0.640617	9.82e-55
CEBPG	0.396195	8.15e-19	0.397262	6.45e-19
CENPA	0.500282	1.24e-30	0.530077	7.83e-35
CENPE	0.742178	5.67e-82	0.735471	8.66e-80
CENPF	0.345188	2.25e-14	0.339722	6.06e-14
CENPI	0.414355	1.36e-20	0.399354	4.07e-19
CENPM	0.541425	1.52e-36	0.617399	6.88e-50
CEP152	0.430585	2.81e-22	0.338656	7.34e-14
CEP55	0.783469	4.33e-97	0.792478	7.76e-101
CEP76	0.52491	4.49e-34	0.460908	1.12e-25
CHAF1A	0.394073	1.29e-18	0.418729	4.88e-21
CHAF1B	0.575578	4.1e-42	0.616421	1.08e-49
CHCHD3	0.437233	5.4e-23	0.438984	3.48e-23
CHEK1	0.733827	2.9e-79	0.779547	1.63e-95
CHEK2	0.467745	1.71e-26	0.44123	1.97e-23
CHORDC1	0.453842	7.45e-25	0.36447	5.83e-16
CIAO1	0.442909	1.28e-23	0.444329	8.92e-24
CIZ1	0.366448	3.95e-16	0.341526	4.38e-14
CKAP2	0.6	1.63e-46	0.537927	5.2e-36
CKAP5	0.643356	2.47e-55	0.587619	3.09e-44
CKS1B	0.683395	7.52e-65	0.706562	4.34e-71
CKS2	0.754622	3.28e-86	0.801003	1.48e-104
CLGN	0.474773	2.38e-27	0.422384	2.05e-21
CLNS1A	0.507937	1.13e-31	0.460907	1.12e-25
CLPB	0.466948	2.14e-26	0.478175	9.02e-28
CLPX	0.391387	2.31e-18	0.333583	1.8e-13
CMAS	0.433003	1.55e-22	0.45817	2.35e-25
CNBP	0.379355	2.92e-17	0.368122	2.84e-16
COCH	0.395552	9.38e-19	0.434504	1.07e-22
COL9A3	0.31123	7.8e-12	0.321635	1.4e-12
COMMD4	0.309211	1.08e-11	0.360672	1.22e-15
COPS3	0.516747	6.68e-33	0.45762	2.72e-25
COPS5	0.447415	4.02e-24	0.35992	1.41e-15
COPS6	0.42133	2.63e-21	0.450502	1.8e-24
COPS8	0.406483	8.26e-20	0.386153	7.06e-18
COQ3	0.301875	3.44e-11	0.327142	5.51e-13
CORO1C	0.37466	7.63e-17	0.431328	2.34e-22
COX5A	0.443583	1.08e-23	0.463949	4.88e-26
COX6C	0.335919	1.19e-13	0.307326	1.46e-11
COX7B	0.383034	1.36e-17	0.383196	1.31e-17
CPSF4	0.410082	3.64e-20	0.380863	2.14e-17
CPSF6	0.585543	7.28e-44	0.507367	1.36e-31
CS	0.31022	9.18e-12	0.300768	4.09e-11
CSE1L	0.726167	7.23e-77	0.662988	8.14e-60
CSK	0.330328	3.18e-13	0.329149	3.9e-13
CSNK2A1	0.422497	1.99e-21	0.453954	7.23e-25
CSNK2B	0.446367	5.27e-24	0.455017	5.45e-25
CSRP2	0.403846	1.5e-19	0.400913	2.88e-19
CSTF1	0.44161	1.79e-23	0.434012	1.21e-22
CSTF2	0.444254	9.09e-24	0.470852	7.21e-27
CSTF3	0.372038	1.3e-16	0.304685	2.22e-11
CTNNAL1	0.416531	8.17e-21	0.313933	5.03e-12
CTNNBL1	0.438461	3.97e-23	0.432649	1.69e-22
CYC1	0.449181	2.54e-24	0.466045	2.74e-26
CYCS	0.54695	2.11e-37	0.547903	1.49e-37
DARS2	0.35599	3e-15	0.366959	3.57e-16
DAZAP1	0.434378	1.1e-22	0.40608	9.05e-20
DBF4	0.744455	9.93e-83	0.731893	1.19e-78
DCK	0.36306	7.68e-16	0.339799	5.98e-14
DDX1	0.49527	5.78e-30	0.382948	1.38e-17
DDX10	0.363637	6.86e-16	0.303277	2.77e-11
DDX18	0.428484	4.7e-22	0.334241	1.61e-13
DDX21	0.381973	1.7e-17	0.324568	8.56e-13
DEK	0.557252	4.79e-39	0.483336	2.02e-28
DENR	0.522012	1.18e-33	0.434007	1.21e-22
DEPDC1	0.491905	1.6e-29	0.503457	4.64e-31
DGUOK	0.456394	3.78e-25	0.452336	1.11e-24
DHCR7	0.333468	1.84e-13	0.347671	1.43e-14
DHFR	0.46871	1.31e-26	0.444676	8.16e-24
DHRS2	0.334555	1.52e-13	0.31357	5.33e-12
DLAT	0.407466	6.61e-20	0.433108	1.51e-22
DLD	0.418489	5.16e-21	0.346518	1.76e-14
DLEU1	0.364276	6.06e-16	0.325434	7.38e-13
DNAJC6	0.343117	3.28e-14	0.303314	2.75e-11
DNAJC9	0.697465	1.44e-68	0.704053	2.2e-70
DNM1L	0.571792	1.83e-41	0.507685	1.23e-31
DNMT1	0.530987	5.74e-35	0.55094	4.94e-38
DNMT3B	0.629549	2.26e-52	0.571928	1.74e-41
DONSON	0.68505	2.82e-65	0.633154	3.94e-53
DPM1	0.47381	3.13e-27	0.393915	1.34e-18
DR1	0.324458	8.72e-13	0.326035	6.66e-13
DRAP1	0.404073	1.42e-19	0.438544	3.88e-23
DRG1	0.34868	1.18e-14	0.365086	5.17e-16
DSP	0.331315	2.68e-13	0.32331	1.06e-12
DTL	0.741586	8.9e-82	0.734904	1.32e-79
DTYMK	0.51959	2.63e-33	0.52757	1.83e-34
DUS4L	0.461529	9.46e-26	0.399582	3.87e-19
DUSP9	0.318097	2.53e-12	0.306089	1.78e-11
DUT	0.437093	5.6e-23	0.40774	6.21e-20
DYNLL1	0.358393	1.89e-15	0.403166	1.74e-19
E2F1	0.354745	3.8e-15	0.387067	5.82e-18
E2F6	0.372997	1.07e-16	0.327099	5.56e-13
E2F8	0.60754	5.96e-48	0.62078	1.44e-50
ECT2	0.683083	9.04e-65	0.663397	6.51e-60
EED	0.554011	1.6e-38	0.493655	9.43e-30
EEF1E1	0.627929	4.91e-52	0.559301	2.22e-39
EIF1AX	0.408566	5.15e-20	0.353666	4.66e-15
EIF2B1	0.410184	3.56e-20	0.36817	2.81e-16
EIF2B2	0.369101	2.34e-16	0.341287	4.58e-14
EIF2S1	0.41413	1.43e-20	0.325406	7.42e-13
EIF4E	0.361394	1.06e-15	0.31416	4.85e-12
EIF4E2	0.340812	4.98e-14	0.38227	1.59e-17
EIF4EBP1	0.535178	1.36e-35	0.595946	9.3e-46
EIF4H	0.358229	1.96e-15	0.373318	1e-16
EIF5	0.458625	2.08e-25	0.389983	3.13e-18
EIF5B	0.450681	1.71e-24	0.3426	3.61e-14
ELAVL1	0.440281	2.5e-23	0.451436	1.41e-24
ELOVL2	0.434988	9.47e-23	0.424161	1.34e-21
ELOVL4	0.305547	1.94e-11	0.329607	3.61e-13
ELOVL6	0.412262	2.21e-20	0.423313	1.64e-21
ELP4	0.326916	5.73e-13	0.353665	4.66e-15
EMG1	0.404443	1.31e-19	0.444044	9.59e-24
ENO1	0.325786	6.95e-13	0.355665	3.19e-15
ENY2	0.503986	3.93e-31	0.458847	1.95e-25
ERH	0.430084	3.18e-22	0.396503	7.62e-19
ESPL1	0.716983	4.24e-74	0.730257	3.89e-78
ETF1	0.395985	8.54e-19	0.331895	2.42e-13
ETFA	0.475455	1.96e-27	0.440968	2.1e-23
EWSR1	0.377002	4.74e-17	0.319373	2.05e-12
EXO1	0.611633	9.53e-49	0.624076	3.06e-51
EXOSC2	0.459298	1.73e-25	0.410213	3.53e-20
EXOSC5	0.349349	1.05e-14	0.387835	4.94e-18
EXOSC8	0.526633	2.52e-34	0.432532	1.74e-22
EXOSC9	0.461205	1.03e-25	0.418708	4.9e-21
EZH2	0.746866	1.54e-83	0.706965	3.33e-71
FADS2	0.325107	7.81e-13	0.327181	5.48e-13
FAF1	0.391393	2.31e-18	0.360331	1.3e-15
FANCA	0.413036	1.84e-20	0.425634	9.38e-22
FANCE	0.32678	5.87e-13	0.305252	2.03e-11
FANCG	0.598331	3.35e-46	0.588482	2.16e-44
FANCL	0.450028	2.03e-24	0.355924	3.04e-15
FBL	0.516712	6.75e-33	0.549466	8.46e-38
FBXO17	0.335021	1.4e-13	0.326095	6.6e-13
FBXO5	0.767812	5.47e-91	0.763543	2.08e-89
FDPS	0.360471	1.27e-15	0.368679	2.54e-16
FEN1	0.708379	1.32e-71	0.73611	5.4e-80
FH	0.308453	1.22e-11	0.326753	5.89e-13
FIP1L1	0.440418	2.42e-23	0.342993	3.36e-14
FKBP10	0.309581	1.02e-11	0.328615	4.28e-13
FKBP3	0.535025	1.43e-35	0.472496	4.54e-27
FKBP4	0.465309	3.36e-26	0.444318	8.94e-24
FOSL1	0.359269	1.6e-15	0.391311	2.35e-18
FOXD1	0.393791	1.38e-18	0.393766	1.38e-18
FOXM1	0.714591	2.14e-73	0.760907	1.9e-88
FOXRED2	0.352912	5.37e-15	0.343091	3.3e-14
FSCN1	0.344479	2.56e-14	0.406101	9.01e-20
FSD1	0.313793	5.14e-12	0.355914	3.04e-15
FST	0.328869	4.1e-13	0.347328	1.52e-14
FXR1	0.465295	3.38e-26	0.411162	2.84e-20
GBE1	0.413142	1.8e-20	0.386701	6.29e-18
GCSH	0.465496	3.19e-26	0.436494	6.5e-23
GEMIN6	0.432899	1.59e-22	0.437739	4.76e-23
GGH	0.566558	1.4e-40	0.592457	4.09e-45
GLDC	0.400964	2.85e-19	0.388652	4.15e-18
GLMN	0.459962	1.45e-25	0.425927	8.74e-22
GLO1	0.378426	3.54e-17	0.303234	2.79e-11
GLRX2	0.354382	4.07e-15	0.36203	9.39e-16
GLRX5	0.37241	1.2e-16	0.421583	2.48e-21
GMNN	0.698346	8.28e-69	0.64975	9.32e-57
GMPS	0.658375	9.86e-59	0.685275	2.47e-65
GNAI3	0.488941	3.87e-29	0.42937	3.79e-22
GNB1	0.313231	5.64e-12	0.362517	8.54e-16
GNL2	0.441355	1.91e-23	0.310021	9.48e-12
GOLT1B	0.384175	1.07e-17	0.409451	4.21e-20
GPI	0.485547	1.06e-28	0.529806	8.59e-35
GPR19	0.498099	2.44e-30	0.527734	1.74e-34
GPS1	0.381508	1.87e-17	0.34542	2.16e-14
GPSM2	0.513944	1.66e-32	0.486178	8.78e-29
GSS	0.314601	4.51e-12	0.307394	1.44e-11
GTF2A2	0.413939	1.5e-20	0.437007	5.72e-23
GTF2E1	0.390614	2.73e-18	0.380578	2.27e-17
GTPBP4	0.549149	9.49e-38	0.480661	4.4e-28
GTSE1	0.472162	4.99e-27	0.528173	1.5e-34
HAT1	0.59755	4.68e-46	0.529648	9.06e-35
HBZ	0.403864	1.49e-19	0.395945	8.61e-19
HDAC1	0.346049	1.92e-14	0.315682	3.78e-12
HDAC2	0.587911	2.74e-44	0.516753	6.66e-33
HDGF	0.313937	5.02e-12	0.325592	7.19e-13
HEATR1	0.39945	3.99e-19	0.319128	2.14e-12
HELLS	0.669925	1.76e-61	0.652286	2.48e-57
HIRA	0.440979	2.1e-23	0.338669	7.32e-14
HMBS	0.422418	2.03e-21	0.399842	3.66e-19
HMGA1	0.544643	4.82e-37	0.573944	7.84e-42
HMGA2	0.328155	4.63e-13	0.324103	9.26e-13
HMGB1	0.471921	5.34e-27	0.405358	1.07e-19
HMGB2	0.739916	3.15e-81	0.744797	7.63e-83
HMGCR	0.427959	5.34e-22	0.359598	1.5e-15
HMGN2	0.317376	2.86e-12	0.357712	2.16e-15
HMMR	0.769425	1.35e-91	0.763836	1.63e-89
HOXA1	0.38171	1.79e-17	0.413343	1.72e-20
HPRT1	0.463999	4.82e-26	0.420978	2.86e-21
HSP90AA1	0.464236	4.52e-26	0.341476	4.42e-14
HSP90AB1	0.37205	1.29e-16	0.328023	4.74e-13
HSPA14	0.486636	7.68e-29	0.399247	4.17e-19
HSPA4L	0.399243	4.17e-19	0.343114	3.29e-14
HSPBP1	0.334505	1.53e-13	0.316773	3.16e-12
HSPD1	0.623361	4.29e-51	0.60169	7.82e-47
HSPE1	0.570865	2.63e-41	0.569207	5.03e-41
HTRA2	0.301446	3.68e-11	0.308979	1.12e-11
IDH3A	0.378252	3.66e-17	0.362607	8.39e-16
IGF2BP3	0.486358	8.33e-29	0.482032	2.96e-28
ILF2	0.435893	7.55e-23	0.431262	2.38e-22
IMMT	0.602174	6.33e-47	0.545016	4.22e-37
IMPAD1	0.311361	7.64e-12	0.367467	3.23e-16
IMPDH2	0.346116	1.9e-14	0.334091	1.65e-13
INSIG1	0.375927	5.9e-17	0.358514	1.85e-15
IPO4	0.455193	5.2e-25	0.445736	6.21e-24
ISCA1	0.316382	3.36e-12	0.301654	3.57e-11
ITGB1BP1	0.381424	1.9e-17	0.387579	5.22e-18
ITGB3BP	0.558026	3.59e-39	0.483605	1.87e-28
KCMF1	0.321311	1.48e-12	0.328839	4.12e-13
KHDRBS1	0.567927	8.27e-41	0.491929	1.59e-29
KIF11	0.802606	2.81e-105	0.791269	2.53e-100
KIF14	0.788636	3.24e-99	0.774018	2.39e-93
KIF15	0.752144	2.4e-85	0.723855	3.69e-76
KIF18A	0.634379	2.16e-53	0.607128	7.16e-48
KIF20A	0.710625	3.02e-72	0.747525	9.2e-84
KIF23	0.738543	8.83e-81	0.741479	9.65e-82
KIF2C	0.750061	1.25e-84	0.777806	7.96e-95
KIF4A	0.763702	1.82e-89	0.806012	7.9e-107
KIFC1	0.698496	7.54e-69	0.722182	1.19e-75
KLHL7	0.494881	6.5e-30	0.476579	1.43e-27
KLRC3	0.313449	5.44e-12	0.347474	1.48e-14
KNTC1	0.670272	1.45e-61	0.585487	7.45e-44
KPNA2	0.685624	2e-65	0.666045	1.52e-60
KPNB1	0.545422	3.65e-37	0.462123	8.04e-26
L1CAM	0.305165	2.06e-11	0.309288	1.07e-11
LAS1L	0.342602	3.61e-14	0.326702	5.95e-13
LBR	0.436703	6.17e-23	0.356639	2.65e-15
LDHA	0.380141	2.48e-17	0.422505	1.99e-21
LDHB	0.349264	1.06e-14	0.309614	1.01e-11
LIG1	0.54309	8.4e-37	0.510067	5.76e-32
LMNB1	0.628576	3.6e-52	0.63509	1.53e-53
LMNB2	0.533445	2.47e-35	0.566619	1.37e-40
LOX	0.388706	4.11e-18	0.438347	4.08e-23
LRFN4	0.438697	3.74e-23	0.46707	2.07e-26
LRP8	0.387435	5.38e-18	0.415203	1.11e-20
LRPPRC	0.45519	5.21e-25	0.322952	1.12e-12
LRRC42	0.33271	2.1e-13	0.37443	8e-17
LSM1	0.321998	1.32e-12	0.300132	4.52e-11
LSM12	0.306321	1.71e-11	0.312014	6.87e-12
LSM2	0.44053	2.35e-23	0.461637	9.18e-26
LSM3	0.395588	9.31e-19	0.422212	2.13e-21
LSM4	0.455536	4.75e-25	0.508229	1.03e-31
LSM6	0.351073	7.58e-15	0.370625	1.72e-16
LSM7	0.317311	2.89e-12	0.353968	4.4e-15
LSM8	0.525999	3.12e-34	0.498565	2.11e-30
MAD2L1	0.819987	1.56e-113	0.840593	1.45e-124
MAGEA1	0.34356	3.03e-14	0.327083	5.57e-13
MAGEA12	0.456604	3.57e-25	0.442263	1.51e-23
MAGEA6	0.457367	2.91e-25	0.456311	3.86e-25
MAP6D1	0.393989	1.32e-18	0.356902	2.52e-15
MAPK6	0.456555	3.62e-25	0.390683	2.69e-18
MAPKAPK5	0.583438	1.73e-43	0.53866	4.02e-36
MAPRE1	0.489341	3.44e-29	0.52846	1.36e-34
MCM10	0.719756	6.36e-75	0.75298	1.23e-85
MCM2	0.710251	3.86e-72	0.765346	4.52e-90
MCM3	0.675875	6.01e-63	0.672824	3.42e-62
MCM4	0.687807	5.41e-66	0.737514	1.9e-80
MCM5	0.519115	3.08e-33	0.561933	8.23e-40
MCM6	0.776792	1.99e-94	0.789984	8.82e-100
MCM7	0.713748	3.76e-73	0.704924	1.25e-70
MDC1	0.428778	4.38e-22	0.413488	1.66e-20
MDH1	0.516766	6.64e-33	0.491533	1.79e-29
MDH2	0.310081	9.39e-12	0.361734	9.94e-16
MEA1	0.318435	2.4e-12	0.312584	6.26e-12
MELK	0.783012	6.63e-97	0.817976	1.56e-112
MEST	0.468038	1.58e-26	0.447872	3.57e-24
MIF	0.30499	2.11e-11	0.355006	3.61e-15
MKI67	0.549059	9.81e-38	0.565264	2.31e-40
MLF2	0.356159	2.9e-15	0.324569	8.55e-13
MLLT11	0.430162	3.12e-22	0.413078	1.83e-20
MMD	0.37938	2.9e-17	0.390258	2.95e-18
MPHOSPH9	0.567361	1.03e-40	0.542388	1.08e-36
MPP6	0.411811	2.45e-20	0.413608	1.62e-20
MRPL12	0.38689	6.04e-18	0.451757	1.29e-24
MRPL13	0.550719	5.36e-38	0.554026	1.59e-38
MRPL15	0.421173	2.73e-21	0.456872	3.32e-25
MRPL16	0.326117	6.57e-13	0.357941	2.07e-15
MRPL18	0.328283	4.53e-13	0.363804	6.64e-16
MRPL19	0.469421	1.08e-26	0.429984	3.26e-22
MRPL2	0.39029	2.93e-18	0.344303	2.65e-14
MRPL22	0.336047	1.17e-13	0.321325	1.48e-12
MRPL3	0.511829	3.28e-32	0.53251	3.4e-35
MRPL35	0.326139	6.55e-13	0.32961	3.6e-13
MRPL39	0.485472	1.08e-28	0.416719	7.82e-21
MRPL42	0.646037	6.31e-56	0.62804	4.66e-52
MRPL48	0.453485	8.19e-25	0.414617	1.28e-20
MRPL9	0.339202	6.66e-14	0.33912	6.76e-14
MRPS12	0.325323	7.52e-13	0.302985	2.9e-11
MRPS15	0.330387	3.15e-13	0.34487	2.39e-14
MRPS16	0.331381	2.65e-13	0.401214	2.7e-19
MRPS17	0.397412	6.25e-19	0.400301	3.3e-19
MRPS2	0.404661	1.25e-19	0.408755	4.93e-20
MRPS22	0.502545	6.17e-31	0.489687	3.1e-29
MRPS28	0.333122	1.96e-13	0.313729	5.2e-12
MRPS30	0.486664	7.61e-29	0.53262	3.28e-35
MRPS33	0.345488	2.13e-14	0.332555	2.16e-13
MSH2	0.713506	4.43e-73	0.636216	8.76e-54
MSH6	0.717875	2.31e-74	0.659228	6.24e-59
MTCH2	0.442474	1.43e-23	0.515981	8.57e-33
MTF2	0.470787	7.34e-27	0.378365	3.58e-17
MTFR1	0.403295	1.69e-19	0.367237	3.38e-16
MTHFD1	0.621672	9.47e-51	0.631851	7.42e-53
MTHFD2	0.65782	1.33e-58	0.672441	4.25e-62
MTIF2	0.506971	1.54e-31	0.408437	5.3e-20
MTMR2	0.459285	1.74e-25	0.408398	5.35e-20
MXD3	0.312443	6.41e-12	0.346591	1.74e-14
MYB	0.52383	6.45e-34	0.456107	4.08e-25
MYBL2	0.654529	7.64e-58	0.713825	3.58e-73
MYC	0.357119	2.42e-15	0.432758	1.65e-22
NARS2	0.399881	3.62e-19	0.300259	4.43e-11
NCAPG2	0.747773	7.58e-84	0.722385	1.03e-75
NCBP2	0.43603	7.3e-23	0.354066	4.32e-15
NCL	0.555401	9.55e-39	0.495093	6.1e-30
NDUFA9	0.373827	9.04e-17	0.414489	1.32e-20
NDUFAB1	0.374064	8.62e-17	0.38136	1.93e-17
NDUFB5	0.341628	4.3e-14	0.380484	2.31e-17
NDUFB6	0.326636	6.01e-13	0.300264	4.43e-11
NDUFS1	0.426682	7.28e-22	0.392483	1.83e-18
NDUFS6	0.302559	3.1e-11	0.357025	2.46e-15
NEIL3	0.527616	1.81e-34	0.549985	7e-38
NEK2	0.75031	1.03e-84	0.739663	3.81e-81
NETO2	0.350484	8.46e-15	0.328824	4.13e-13
NIF3L1	0.377039	4.7e-17	0.320649	1.66e-12
NMD3	0.508438	9.68e-32	0.481676	3.28e-28
NME1	0.499477	1.6e-30	0.559508	2.06e-39
NMT1	0.442556	1.4e-23	0.445424	6.73e-24
NMU	0.320256	1.77e-12	0.320693	1.64e-12
NOC3L	0.458862	1.95e-25	0.341686	4.26e-14
NOC4L	0.34855	1.21e-14	0.349966	9.32e-15
NOL11	0.576612	2.72e-42	0.470355	8.28e-27
NOLC1	0.489384	3.4e-29	0.511145	4.08e-32
NONO	0.32637	6.29e-13	0.300207	4.46e-11
NRAS	0.560766	1.28e-39	0.546077	2.88e-37
NUDC	0.367229	3.39e-16	0.315789	3.71e-12
NUDT1	0.469737	9.85e-27	0.53606	9.98e-36
NUDT15	0.486544	7.89e-29	0.446721	4.81e-24
NUDT21	0.467834	1.67e-26	0.507648	1.24e-31
NUP107	0.562257	7.28e-40	0.478697	7.76e-28
NUP153	0.426704	7.25e-22	0.320978	1.57e-12
NUP155	0.667382	7.25e-61	0.639804	1.48e-54
NUP188	0.343406	3.12e-14	0.330235	3.23e-13
NUP205	0.677477	2.39e-63	0.644077	1.71e-55
NUP210	0.368475	2.65e-16	0.372388	1.21e-16
NUP37	0.651	4.86e-57	0.662585	1.01e-59
NUP43	0.390297	2.92e-18	0.334515	1.53e-13
NUP62	0.433881	1.25e-22	0.41505	1.16e-20
NUP85	0.545135	4.04e-37	0.498851	1.93e-30
NUP88	0.417289	6.84e-21	0.320954	1.57e-12
NUP93	0.438747	3.69e-23	0.450884	1.63e-24
NUSAP1	0.82118	3.91e-114	0.81845	9.06e-113
NUTF2	0.345206	2.24e-14	0.363239	7.42e-16
NXT1	0.326426	6.23e-13	0.385975	7.33e-18
ODF2	0.391044	2.49e-18	0.345685	2.06e-14
OIP5	0.708323	1.37e-71	0.740773	1.65e-81
PA2G4	0.436415	6.63e-23	0.439779	2.84e-23
PAFAH1B3	0.322563	1.2e-12	0.335535	1.28e-13
PAICS	0.646227	5.73e-56	0.636703	6.89e-54
PAK1IP1	0.540788	1.9e-36	0.440938	2.12e-23
PANK2	0.378613	3.4e-17	0.333675	1.77e-13
PARP1	0.494162	8.09e-30	0.464154	4.62e-26
PARP2	0.429609	3.57e-22	0.398328	5.11e-19
PAXIP1	0.557188	4.91e-39	0.437712	4.79e-23
PBK	0.809712	1.5e-108	0.807208	2.21e-107
PCBP2	0.356504	2.72e-15	0.366256	4.1e-16
PCCB	0.334664	1.49e-13	0.308142	1.28e-11
PCMT1	0.363363	7.24e-16	0.305092	2.08e-11
PCNA	0.76378	1.71e-89	0.79575	3.04e-102
PDAP1	0.373916	8.88e-17	0.390506	2.79e-18
PDCD10	0.425516	9.66e-22	0.391131	2.44e-18
PDCD2	0.300103	4.54e-11	0.303153	2.82e-11
PDCD5	0.505251	2.65e-31	0.516936	6.28e-33
PDK1	0.439773	2.85e-23	0.463465	5.58e-26
PDSS1	0.617315	7.16e-50	0.582392	2.64e-43
PES1	0.331438	2.62e-13	0.339518	6.29e-14
PFAS	0.38318	1.32e-17	0.309605	1.01e-11
PFDN2	0.397173	6.58e-19	0.403746	1.53e-19
PFN2	0.451557	1.36e-24	0.442711	1.35e-23
PGAM1	0.533304	2.59e-35	0.584362	1.18e-43
PGK1	0.447131	4.33e-24	0.428103	5.16e-22
PHB	0.459582	1.6e-25	0.508852	8.49e-32
PHB2	0.312287	6.57e-12	0.343673	2.97e-14
PHGDH	0.491347	1.89e-29	0.483227	2.09e-28
PIK3R4	0.33223	2.29e-13	0.30718	1.49e-11
PITX1	0.337559	8.93e-14	0.431412	2.29e-22
PKMYT1	0.483056	2.2e-28	0.507717	1.22e-31
PLK1	0.695792	4.09e-68	0.720322	4.3e-75
PLK4	0.597069	5.76e-46	0.59825	3.47e-46
PLOD2	0.461221	1.03e-25	0.492231	1.45e-29
PLOD3	0.324492	8.67e-13	0.351962	6.42e-15
PMAIP1	0.413517	1.65e-20	0.44205	1.6e-23
PNMA1	0.437716	4.78e-23	0.409232	4.42e-20
POLA1	0.502345	6.56e-31	0.410668	3.18e-20
POLA2	0.619191	3.01e-50	0.657805	1.34e-58
POLD1	0.460499	1.25e-25	0.462396	7.47e-26
POLD2	0.439562	3e-23	0.464139	4.64e-26
POLD3	0.445516	6.57e-24	0.362032	9.38e-16
POLE	0.51473	1.29e-32	0.438643	3.79e-23
POLE2	0.65144	3.87e-57	0.635145	1.48e-53
POLE3	0.544858	4.47e-37	0.554983	1.12e-38
POLQ	0.514484	1.39e-32	0.511516	3.63e-32
POLR2D	0.468254	1.49e-26	0.439118	3.36e-23
POLR2F	0.37569	6.19e-17	0.368528	2.62e-16
POLR2G	0.346185	1.88e-14	0.367638	3.12e-16
POLR2H	0.395556	9.37e-19	0.407811	6.11e-20
POLR2J	0.351337	7.21e-15	0.358275	1.94e-15
POLR3G	0.476891	1.3e-27	0.425989	8.61e-22
POP7	0.440074	2.64e-23	0.477447	1.11e-27
POT1	0.410889	3.03e-20	0.348047	1.33e-14
PPAT	0.496979	3.43e-30	0.448379	3.13e-24
PPFIA4	0.373467	9.72e-17	0.344291	2.65e-14
PPID	0.416965	7.38e-21	0.442673	1.36e-23
PPIF	0.489295	3.49e-29	0.544145	5.77e-37
PPIH	0.514231	1.51e-32	0.539764	2.73e-36
PPM1G	0.467944	1.62e-26	0.481133	3.84e-28
PPME1	0.343969	2.81e-14	0.300323	4.39e-11
PPP1CC	0.553031	2.29e-38	0.525789	3.34e-34
PPP1R14B	0.375484	6.46e-17	0.384209	1.06e-17
PRAME	0.46208	8.14e-26	0.444066	9.54e-24
PRC1	0.827101	3.55e-117	0.85159	4.09e-131
PRDX6	0.309142	1.09e-11	0.337027	9.82e-14
PREB	0.390939	2.55e-18	0.38982	3.24e-18
PRIM1	0.684923	3.04e-65	0.69461	8.52e-68
PRKDC	0.573871	8.07e-42	0.514659	1.32e-32
PRMT1	0.460561	1.23e-25	0.403177	1.74e-19
PRMT3	0.366835	3.66e-16	0.331144	2.76e-13
PRMT5	0.484255	1.55e-28	0.47996	5.4e-28
PRPF19	0.412047	2.32e-20	0.381579	1.84e-17
PRPF4	0.610501	1.59e-48	0.631291	9.73e-53
PRPS1	0.405938	9.35e-20	0.424347	1.28e-21
PRR3	0.420698	3.06e-21	0.33629	1.12e-13
PSAT1	0.531664	4.55e-35	0.553175	2.18e-38
PSIP1	0.47891	7.3e-28	0.371432	1.47e-16
PSMA3	0.450559	1.77e-24	0.384661	9.67e-18
PSMA4	0.521788	1.27e-33	0.456507	3.66e-25
PSMA5	0.493255	1.06e-29	0.491218	1.96e-29
PSMA7	0.445913	5.93e-24	0.479969	5.38e-28
PSMB1	0.462007	8.3e-26	0.448711	2.87e-24
PSMB2	0.323738	9.85e-13	0.370521	1.76e-16
PSMB5	0.441577	1.8e-23	0.464749	3.92e-26
PSMB6	0.355703	3.17e-15	0.37812	3.76e-17
PSMB7	0.517825	4.69e-33	0.563522	4.49e-40
PSMC3	0.403238	1.72e-19	0.423938	1.41e-21
PSMC3IP	0.62854	3.66e-52	0.60793	5.01e-48
PSMC4	0.444897	7.71e-24	0.472979	3.96e-27
PSMC5	0.365063	5.19e-16	0.332103	2.34e-13
PSMD1	0.439071	3.4e-23	0.41588	9.52e-21
PSMD12	0.599608	1.93e-46	0.610936	1.3e-48
PSMD14	0.546485	2.49e-37	0.502901	5.52e-31
PSMD2	0.444197	9.22e-24	0.465623	3.08e-26
PSMD3	0.33768	8.74e-14	0.334794	1.46e-13
PSMD6	0.4416	1.79e-23	0.374844	7.35e-17
PSMD7	0.369462	2.17e-16	0.331936	2.41e-13
PSMD8	0.319774	1.92e-12	0.370344	1.82e-16
PSME3	0.433953	1.22e-22	0.490878	2.17e-29
PSME4	0.444501	8.53e-24	0.334915	1.43e-13
PSPH	0.356596	2.67e-15	0.386616	6.4e-18
PSRC1	0.563597	4.37e-40	0.572848	1.21e-41
PTBP1	0.396139	8.25e-19	0.389338	3.59e-18
PTDSS1	0.363998	6.4e-16	0.406727	7.82e-20
PTGES2	0.349084	1.1e-14	0.382483	1.53e-17
PTGES3	0.54443	5.21e-37	0.513129	2.16e-32
PTRH2	0.412172	2.25e-20	0.3846	9.79e-18
PTS	0.360348	1.3e-15	0.373541	9.58e-17
PTTG1	0.554887	1.16e-38	0.611465	1.03e-48
PUS1	0.413139	1.8e-20	0.390857	2.59e-18
PUS7	0.518191	4.17e-33	0.451229	1.48e-24
PWP1	0.437055	5.65e-23	0.409513	4.15e-20
PXMP2	0.350157	8.99e-15	0.364901	5.36e-16
PYGL	0.378593	3.42e-17	0.398218	5.23e-19
R3HDM1	0.529094	1.09e-34	0.500614	1.12e-30
RAB3B	0.397429	6.22e-19	0.411356	2.72e-20
RABGGTB	0.407172	7.07e-20	0.317396	2.85e-12
RAC3	0.35287	5.41e-15	0.361527	1.04e-15
RACGAP1	0.796479	1.47e-102	0.816849	5.59e-112
RAD21	0.355055	3.58e-15	0.34087	4.93e-14
RAD23B	0.372452	1.19e-16	0.361472	1.05e-15
RAD51AP1	0.781625	2.41e-96	0.776571	2.43e-94
RAD51C	0.536994	7.2e-36	0.505326	2.59e-31
RAD54B	0.596208	8.32e-46	0.541935	1.27e-36
RAD54L	0.670566	1.22e-61	0.694196	1.1e-67
RAE1	0.54045	2.14e-36	0.499121	1.78e-30
RALA	0.365463	4.8e-16	0.400057	3.48e-19
RANBP1	0.358916	1.71e-15	0.369714	2.07e-16
RANGAP1	0.431629	2.18e-22	0.436596	6.34e-23
RBBP7	0.515526	9.94e-33	0.458699	2.03e-25
RBL1	0.529808	8.58e-35	0.453829	7.47e-25
RBM12	0.429444	3.72e-22	0.37502	7.1e-17
RBM15	0.43702	5.7e-23	0.307245	1.48e-11
RBM28	0.513742	1.77e-32	0.484718	1.35e-28
RCC1	0.450306	1.89e-24	0.405975	9.27e-20
RCN2	0.391322	2.35e-18	0.310773	8.4e-12
RECQL	0.387972	4.8e-18	0.34288	3.43e-14
RECQL4	0.604253	2.55e-47	0.628218	4.28e-52
REXO4	0.400837	2.93e-19	0.367752	3.05e-16
RFC2	0.524289	5.53e-34	0.604819	1.99e-47
RFC3	0.746671	1.79e-83	0.70016	2.64e-69
RFC4	0.769599	1.16e-91	0.776358	2.94e-94
RFC5	0.724819	1.87e-76	0.740093	2.75e-81
RFWD3	0.525245	4.02e-34	0.494069	8.32e-30
RIF1	0.48876	4.09e-29	0.429164	3.98e-22
RMI1	0.535109	1.39e-35	0.451757	1.29e-24
RNASEH2A	0.641313	6.93e-55	0.696471	2.68e-68
RNF126	0.363529	7.01e-16	0.387127	5.74e-18
RNF138	0.477758	1.02e-27	0.39567	9.14e-19
RNF7	0.317216	2.93e-12	0.339396	6.43e-14
RPA1	0.501261	9.19e-31	0.440251	2.52e-23
RPA3	0.499666	1.5e-30	0.536203	9.49e-36
RPE	0.404058	1.43e-19	0.325117	7.79e-13
RPIA	0.376475	5.27e-17	0.32451	8.64e-13
RPL39L	0.385478	8.14e-18	0.440658	2.28e-23
RPP30	0.399782	3.7e-19	0.355149	3.52e-15
RPP40	0.471199	6.54e-27	0.462588	7.09e-26
RRM1	0.617991	5.24e-50	0.610303	1.73e-48
RRM2	0.758619	1.26e-87	0.80811	8.44e-108
RRS1	0.338193	7.97e-14	0.334741	1.47e-13
RSL1D1	0.358573	1.83e-15	0.316417	3.35e-12
RUVBL1	0.552011	3.34e-38	0.60637	1e-47
RUVBL2	0.469009	1.21e-26	0.422344	2.07e-21
SAC3D1	0.548196	1.34e-37	0.56236	7e-40
SACS	0.423355	1.62e-21	0.331273	2.7e-13
SAE1	0.548949	1.02e-37	0.527504	1.88e-34
SCD	0.336165	1.14e-13	0.394011	1.31e-18
SEC23A	0.398823	4.58e-19	0.400739	3e-19
SEC61G	0.30133	3.75e-11	0.344262	2.67e-14
SEH1L	0.444624	8.27e-24	0.35951	1.53e-15
SEPHS1	0.43782	4.66e-23	0.365349	4.91e-16
SERBP1	0.493094	1.12e-29	0.478944	7.23e-28
SERPINE1	0.307295	1.47e-11	0.305554	1.93e-11
SERPINE2	0.328891	4.08e-13	0.355421	3.34e-15
SET	0.429756	3.45e-22	0.420859	2.94e-21
SF3B2	0.399299	4.12e-19	0.314178	4.83e-12
SF3B3	0.446161	5.56e-24	0.445536	6.54e-24
SFPQ	0.352624	5.67e-15	0.318715	2.29e-12
SFXN1	0.423359	1.62e-21	0.414869	1.2e-20
SHCBP1	0.703885	2.45e-70	0.708276	1.42e-71
SHMT2	0.389997	3.12e-18	0.405446	1.04e-19
SIAH2	0.354026	4.35e-15	0.387925	4.85e-18
SKP2	0.632344	5.84e-53	0.619892	2.17e-50
SLBP	0.514057	1.6e-32	0.529994	8.06e-35
SLC16A1	0.452233	1.14e-24	0.464769	3.9e-26
SLC1A5	0.344136	2.73e-14	0.308928	1.13e-11
SLC25A10	0.343923	2.84e-14	0.335495	1.29e-13
SLC25A13	0.466606	2.35e-26	0.407162	7.09e-20
SLC25A15	0.361777	9.86e-16	0.363809	6.64e-16
SLC25A3	0.366729	3.74e-16	0.388596	4.2e-18
SLC25A40	0.378579	3.43e-17	0.369734	2.06e-16
SLC27A5	0.308725	1.17e-11	0.327306	5.36e-13
SLC38A1	0.376724	5.01e-17	0.375467	6.48e-17
SLC39A14	0.348581	1.21e-14	0.34512	2.28e-14
SLC39A6	0.474701	2.43e-27	0.386427	6.66e-18
SLC3A2	0.329305	3.8e-13	0.326246	6.43e-13
SLC5A6	0.356727	2.61e-15	0.359844	1.43e-15
SLC6A15	0.352741	5.54e-15	0.351403	7.13e-15
SLC6A8	0.379064	3.1e-17	0.379344	2.93e-17
SLC7A5	0.530342	7.15e-35	0.521031	1.63e-33
SMC2	0.716557	5.66e-74	0.657366	1.69e-58
SMC4	0.638471	2.87e-54	0.560622	1.35e-39
SMNDC1	0.465591	3.11e-26	0.396471	7.68e-19
SMS	0.513927	1.67e-32	0.508786	8.66e-32
SMU1	0.378425	3.54e-17	0.384899	9.2e-18
SNAPC1	0.475025	2.22e-27	0.414396	1.35e-20
SNCA	0.301803	3.48e-11	0.306443	1.68e-11
SNRPA	0.436193	7.01e-23	0.423029	1.76e-21
SNRPA1	0.573318	1e-41	0.515286	1.07e-32
SNRPB	0.578545	1.25e-42	0.627473	6.1e-52
SNRPB2	0.440116	2.61e-23	0.34456	2.53e-14
SNRPC	0.431257	2.38e-22	0.464659	4.02e-26
SNRPD1	0.703235	3.72e-70	0.690028	1.41e-66
SNRPD2	0.435339	8.67e-23	0.508602	9.19e-32
SNRPD3	0.410309	3.46e-20	0.384543	9.91e-18
SNRPE	0.513057	2.21e-32	0.502294	6.67e-31
SNRPF	0.574235	6.99e-42	0.594286	1.89e-45
SNRPG	0.604498	2.29e-47	0.619145	3.07e-50
SPAG5	0.720973	2.74e-75	0.749282	2.32e-84
SPATA2	0.315128	4.14e-12	0.305424	1.97e-11
SPC25	0.708958	9.05e-72	0.707494	2.36e-71
SRM	0.449428	2.38e-24	0.460786	1.16e-25
SSB	0.580212	6.4e-43	0.518565	3.68e-33
SSBP1	0.477213	1.19e-27	0.419938	3.66e-21
SSR1	0.344752	2.44e-14	0.324659	8.42e-13
SSRP1	0.614588	2.5e-49	0.616315	1.13e-49
STC2	0.379489	2.84e-17	0.418318	5.37e-21
STIL	0.686484	1.2e-65	0.663853	5.07e-60
STIP1	0.401079	2.78e-19	0.421994	2.25e-21
STMN1	0.487846	5.37e-29	0.444139	9.36e-24
STOML2	0.468943	1.23e-26	0.50543	2.5e-31
STRAP	0.363734	6.74e-16	0.323623	1e-12
SUPT16H	0.578899	1.09e-42	0.487877	5.32e-29
SUV39H1	0.334059	1.66e-13	0.3391	6.78e-14
SV2A	0.383088	1.34e-17	0.363134	7.57e-16
SYNGR3	0.316214	3.46e-12	0.351693	6.75e-15
TACC3	0.619223	2.96e-50	0.652728	1.97e-57
TAF5	0.436418	6.63e-23	0.340386	5.38e-14
TAF6	0.422854	1.83e-21	0.381474	1.88e-17
TBCA	0.447253	4.19e-24	0.429539	3.63e-22
TBPL1	0.511535	3.6e-32	0.464667	4.01e-26
TCOF1	0.326865	5.78e-13	0.320207	1.78e-12
TDP1	0.436128	7.12e-23	0.451904	1.24e-24
TEAD4	0.39593	8.64e-19	0.454711	5.91e-25
TEX10	0.411034	2.93e-20	0.410791	3.09e-20
TFAM	0.339651	6.14e-14	0.302934	2.92e-11
TFAP2A	0.357015	2.47e-15	0.346475	1.78e-14
TFDP2	0.42311	1.72e-21	0.439222	3.27e-23
TFRC	0.4708	7.31e-27	0.439841	2.8e-23
THOP1	0.328645	4.26e-13	0.336778	1.03e-13
TIMELESS	0.679029	9.72e-64	0.649443	1.09e-56
TIMM13	0.33305	1.98e-13	0.344408	2.6e-14
TIMM17A	0.348245	1.28e-14	0.315574	3.84e-12
TIMM44	0.427055	6.65e-22	0.400687	3.03e-19
TIMM8A	0.438955	3.5e-23	0.423563	1.54e-21
TK1	0.550321	6.2e-38	0.62917	2.71e-52
TMEM106C	0.385135	8.75e-18	0.412083	2.3e-20
TMEM38B	0.468047	1.58e-26	0.49372	9.24e-30
TMPO	0.737449	2e-80	0.734078	2.42e-79
TNPO3	0.325769	6.97e-13	0.311301	7.71e-12
TOMM40	0.515467	1.01e-32	0.497962	2.54e-30
TOP2A	0.775838	4.7e-94	0.763537	2.09e-89
TOPBP1	0.64116	7.48e-55	0.583176	1.92e-43
TPD52L2	0.357642	2.19e-15	0.367694	3.09e-16
TPI1	0.417084	7.18e-21	0.45778	2.6e-25
TPRKB	0.640649	9.67e-55	0.619251	2.92e-50
TPX2	0.78339	4.66e-97	0.830568	5.18e-119
TRAIP	0.456259	3.91e-25	0.451659	1.33e-24
TRIB3	0.382947	1.38e-17	0.381762	1.77e-17
TRIM28	0.541487	1.48e-36	0.495733	5.02e-30
TRIM37	0.538961	3.62e-36	0.415983	9.29e-21
TRIP13	0.691139	7.19e-67	0.727307	3.22e-77
TRMT5	0.370531	1.76e-16	0.395809	8.87e-19
TROAP	0.577508	1.9e-42	0.574553	6.16e-42
TRRAP	0.386786	6.18e-18	0.312029	6.85e-12
TSN	0.412111	2.28e-20	0.426643	7.35e-22
TTF2	0.432971	1.56e-22	0.385308	8.44e-18
TTK	0.823138	3.97e-115	0.828798	4.53e-118
TTLL4	0.357227	2.37e-15	0.363547	6.98e-16
TUBB	0.564208	3.46e-40	0.602533	5.42e-47
TUBB2B	0.366277	4.09e-16	0.318361	2.43e-12
TUBB3	0.5277	1.76e-34	0.55224	3.07e-38
TUBD1	0.406159	8.89e-20	0.34973	9.74e-15
TUBG1	0.652101	2.74e-57	0.6569	2.17e-58
TWSG1	0.342972	3.37e-14	0.341831	4.15e-14
TYMS	0.737134	2.53e-80	0.742617	4.06e-82
U2AF1	0.379126	3.06e-17	0.379116	3.07e-17
UBA2	0.540325	2.24e-36	0.471051	6.82e-27
UBAP2L	0.404597	1.27e-19	0.321192	1.51e-12
UBE2A	0.34434	2.63e-14	0.392057	2e-18
UBE2C	0.612021	8e-49	0.677324	2.61e-63
UBE2E3	0.358789	1.76e-15	0.387931	4.84e-18
UBE2M	0.436429	6.61e-23	0.454295	6.61e-25
UBE2N	0.45236	1.1e-24	0.483383	2e-28
UBE2S	0.738578	8.6e-81	0.785727	5.18e-98
UBE2V2	0.531956	4.12e-35	0.490208	2.66e-29
UCHL3	0.471098	6.73e-27	0.487015	6.86e-29
UCHL5	0.425394	9.94e-22	0.32698	5.67e-13
UMPS	0.431109	2.47e-22	0.461262	1.02e-25
UNG	0.711097	2.21e-72	0.691898	4.52e-67
UQCRC1	0.411882	2.41e-20	0.403387	1.66e-19
UQCRFS1	0.347178	1.56e-14	0.384562	9.87e-18
USP1	0.488525	4.38e-29	0.436672	6.22e-23
USP39	0.351546	6.94e-15	0.326434	6.22e-13
VANGL1	0.475096	2.17e-27	0.463	6.33e-26
VBP1	0.50793	1.14e-31	0.414443	1.33e-20
VDAC1	0.392414	1.85e-18	0.433904	1.24e-22
VDAC2	0.415589	1.02e-20	0.428689	4.47e-22
VPS33B	0.372784	1.12e-16	0.323108	1.1e-12
VRK1	0.70951	6.29e-72	0.660355	3.4e-59
WASF1	0.4816	3.35e-28	0.478789	7.56e-28
WBP11	0.474017	2.95e-27	0.488399	4.55e-29
WDHD1	0.38948	3.48e-18	0.370888	1.63e-16
WDR12	0.618312	4.52e-50	0.615977	1.32e-49
WDR18	0.32094	1.58e-12	0.327855	4.88e-13
WDR43	0.364756	5.51e-16	0.326115	6.57e-13
WDR76	0.379762	2.68e-17	0.382783	1.43e-17
WDR77	0.364416	5.89e-16	0.357683	2.17e-15
XPO1	0.477194	1.2e-27	0.354878	3.7e-15
XPOT	0.541895	1.28e-36	0.487596	5.78e-29
XRCC3	0.430291	3.02e-22	0.419356	4.2e-21
XRCC5	0.573343	9.95e-42	0.515867	8.9e-33
YARS2	0.366172	4.17e-16	0.346379	1.81e-14
YBX1	0.423869	1.43e-21	0.487676	5.64e-29
YEATS2	0.403896	1.48e-19	0.367327	3.32e-16
YEATS4	0.431534	2.23e-22	0.4	3.53e-19
YES1	0.431916	2.03e-22	0.31478	4.38e-12
YKT6	0.390778	2.64e-18	0.386467	6.61e-18
YME1L1	0.464294	4.44e-26	0.426103	8.38e-22
YWHAB	0.333683	1.77e-13	0.336362	1.1e-13
YWHAE	0.417672	6.25e-21	0.403327	1.68e-19
YWHAQ	0.513892	1.69e-32	0.514768	1.27e-32
YWHAZ	0.336964	9.93e-14	0.341008	4.81e-14
ZC3H15	0.491888	1.61e-29	0.402927	1.84e-19
ZIC1	0.348176	1.3e-14	0.338482	7.57e-14
ZNHIT3	0.377774	4.04e-17	0.322296	1.26e-12
ZWILCH	0.671179	8.68e-62	0.633662	3.07e-53
ZWINT	0.783184	5.65e-97	0.784411	1.79e-97
