# Supplementary material for: Prognostic Signature for Lung Adenocarcinoma Patients Based on Cell-Cycle-Related Genes
Source: Front Cell Dev Biol. 2021 Mar 18;9:655950. doi: 10.3389/fcell.2021.655950 (PMC8044954; doi:10.3389/fcell.2021.655950)
Supplement: Supplementary Table 2 — Details of 148 LUAC-specific CCRGs in LUAC. [file Table_2.XLSX]

## Sheet: Sheet1
symbol	logFC	PValue
CTNNAL1	-2.03321	1.66284e-124
ETF1	-1.29416	1.79638e-90
CORO1C	-1.51332	7.32787e-85
INSIG1	-1.59863	7.99689e-57
TOP2A	3.09664	2.68428e-53
RALA	-1.03378	1.38622e-51
HMGCR	-1.31088	3.23151e-50
ATP1B3	-1.16011	6.01496e-48
CDC20	2.94857	3.76844e-47
TFRC	-1.64959	3.90234e-46
UBE2C	3.37957	7.80832e-45
CCNB1	2.22023	3.64312e-43
TPX2	2.83553	1.00482e-41
BIRC5	2.83108	2.0133e-40
PPP1R14B	1.46545	1.01256e-38
ZWINT	1.89398	2.56133e-37
RRM2	2.44163	5.07052e-37
MYBL2	2.9684	2.2193e-36
NME1	1.53429	6.53038e-35
TK1	1.9495	3.02552e-34
SCD	-1.48049	4.68621e-34
PAICS	1.21738	5.02519e-34
NUSAP1	1.84217	9.25118e-34
PSAT1	2.72985	1.1892e-33
CDCA8	2.25483	2.47929e-33
CEP55	2.4767	3.41443e-33
KIF2C	2.70086	6.82635e-33
TEAD4	-1.15091	1.99382e-32
NEK2	2.83745	2.46308e-32
CCNB2	2.24723	1.27243e-31
KIF4A	2.88498	1.07619e-30
MELK	2.74611	2.62059e-30
KIF20A	2.38363	1.07311e-29
SPAG5	2.30196	1.12184e-29
PLK1	2.37871	1.49284e-29
AURKB	2.52657	3.16536e-29
FOXM1	2.52773	7.5463e-29
KPNA2	1.26976	1.21196e-28
PAFAH1B3	1.55868	1.32217e-28
MCM4	1.53834	1.77557e-28
CCNA2	2.10528	9.91766e-28
PSIP1	-1.04802	1.4629e-27
CDC6	2.55719	5.02232e-27
CENPF	2.643	1.96247e-26
MKI67	2.33499	2.87853e-26
RECQL4	2.22505	5.12273e-26
ASF1B	1.67769	8.37923e-26
KIF11	1.96605	1.98482e-25
RCC1	1.13664	6.45164e-25
HMGA1	1.56467	7.14291e-25
AURKA	1.90009	8.21406e-25
KIFC1	1.9549	1.50397e-24
BUB1B	2.50517	7.18499e-24
PRC1	1.7933	9.92177e-24
TROAP	2.76989	2.1554e-23
PTTG1	1.63564	5.29212e-23
CENPA	2.64277	1.47727e-22
CDT1	1.98521	1.79163e-22
HMMR	2.21766	3.41567e-22
EZH2	1.82662	5.33105e-22
ECT2	1.47297	8.57596e-22
SLC7A5	1.95128	1.05952e-21
PBK	2.44882	1.13622e-21
CDKN3	2.05775	8.90809e-21
PITX1	3.41996	5.57014e-20
TUBB3	3.14891	5.74746e-20
MCM2	1.32482	1.12537e-19
BUB1	1.90865	1.20645e-19
LMNB1	1.1881	3.18266e-19
NMU	3.51541	4.44396e-19
SLC25A10	1.50315	4.9036e-19
TRIP13	1.81742	7.48724e-19
PRAME	5.1259	9.22258e-19
GTSE1	2.21867	2.12214e-18
EXO1	2.5583	2.94217e-18
CCNE1	2.41382	3.75207e-17
TYMS	1.20905	5.1837e-17
TTK	2.36798	5.29297e-17
ASPM	2.64342	8.4233e-17
RPL39L	1.60723	9.02168e-17
DEPDC1	2.65873	1.07755e-16
RAC3	1.6472	2.79799e-16
PKMYT1	2.11073	3.72832e-16
MAD2L1	1.78082	6.32375e-16
RAD54L	2.31653	2.19985e-15
TIMELESS	1.055	2.91993e-15
E2F8	2.21519	3.61772e-15
CKS1B	1.03026	7.84842e-15
DSP	1.57045	7.91636e-15
KIF23	1.80656	8.66209e-15
TFAP2A	2.57845	9.56291e-15
CDCA3	2.17097	1.59917e-14
MCM10	2.44895	2.56471e-14
PPAT	1.28191	3.76817e-14
ATAD2	1.18913	7.00666e-14
CDC25C	2.44946	2.16649e-13
RFC4	1.09758	2.39139e-13
NEIL3	2.73205	2.88298e-13
KIF14	2.50188	6.48926e-13
ESPL1	2.13373	2.55831e-12
SHCBP1	1.5611	2.74725e-12
RAD51AP1	1.35312	6.24892e-12
TUBB2B	2.98155	6.90345e-12
CHEK1	1.53241	1.26462e-11
SPC25	1.55678	1.39234e-11
PLOD2	1.39124	1.5355e-11
SERPINE1	-1.24406	1.67476e-11
NCAPG2	1.13158	3.04659e-11
STIL	1.76395	4.15359e-11
KNTC1	1.43163	5.62877e-11
IGF2BP3	2.6298	5.98276e-11
COCH	2.51996	8.17745e-11
CCNF	1.22021	1.22357e-10
DTL	1.1891	1.29779e-10
POLE2	1.5737	1.98742e-10
CENPM	1.05926	3.10985e-10
MAGEA6	4.67004	3.78196e-10
ARHGAP11A	1.37106	1.03697e-09
OIP5	1.5691	1.06528e-09
FKBP10	1.12806	1.3732e-09
APOBEC3B	1.51262	1.70593e-09
KIF15	1.80765	1.8389e-09
CHAF1B	1.2534	2.87754e-09
SLC6A8	1.20518	1.11091e-08
CENPE	1.78301	1.75276e-08
CENPI	1.79946	1.77117e-08
HELLS	1.58394	2.1878e-08
MAGEA12	4.03046	2.23092e-08
DUSP9	2.59519	2.84395e-08
HMGA2	2.99816	3.18362e-08
PLK4	1.33361	6.51187e-08
WDHD1	1.13951	7.36235e-08
FOSL1	-1.14626	2.26144e-07
MAGEA1	3.69536	3.58487e-07
SYNGR3	1.77038	6.68222e-07
CDC25A	1.51484	9.79906e-07
BRIP1	1.69316	1.33776e-06
PDK1	1.06397	1.37922e-06
FANCA	1.13922	1.06695e-05
BLM	1.26882	1.48866e-05
CCNE2	1.27708	1.51282e-05
DNMT3B	1.23601	3.35471e-05
TRAIP	1.07417	3.85946e-05
GLDC	1.66402	5.23019e-05
C1orf112	1.02494	5.52519e-05
DHRS2	2.11789	0.000259192
CLGN	1.01786	0.00254509
CDH2	1.09835	0.00409211
